# Supplementary material
Source: MDPI journal article supplement (https://www.mdpi.com/2073-8994/15/3/630)
Supplement: s1 [file s1]

## Supplementary Material

**Table S1.** Global non-Newtonian importance factor for all 16 rheological models at the three instances of the cardiac cycle.

| Global non-Newtonian importance factor, Ig |       |              |                |               |
|--------------------------------------------|-------|--------------|----------------|---------------|
| #                                          | Model | Peak systole | Early diastole | Late diastole |
| 1                                          | C     | 0.046        | 0.239          | 1.609         |
| 2                                          | CY    | 0.025        | 0.219          | 1.757         |
| 3                                          | Cs    | 0.041        | 0.147          | 2.534         |
| 4                                          | Cs-m  | 0.076        | 0.162          | 0.364         |
| 5                                          | Cr    | 0.008        | 0.201          | 2.175         |
| 6                                          | Cr-m  | 0.028        | 0.214          | 3.207         |
| 7                                          | Cr-s  | 0.205        | 0.258          | 1.083         |
| 8                                          | HB    | 0.110        | 0.072          | 0.598         |
| 9                                          | KL    | 0.027        | 0.090          | 0.687         |
| 10                                         | N     | 0.000        | 0.000          | 0.000         |
| 11                                         | PE    | 0.016        | 0.199          | 2.216         |
| 12                                         | PE-m  | 0.016        | 0.211          | 1.579         |
| 13                                         | P     | 0.055        | 0.210          | 0.743         |
| 14                                         | P-g   | 0.019        | 0.439          | 1.619         |
| 15                                         | Q     | 0.042        | 0.105          | 0.387         |
| 16                                         | WS    | 0.074        | 0.127          | 0.703         |

**Table S2a.** Local non-Newtonian importance factor for all 16 rheological models at peak systole.

| Local non-Newtonian importance factor, IL, PEAK SYSTOLE |       |                           |                              |                              |                              |                              |                              |                              |                              |                              |                              |                            |                            |
|---------------------------------------------------------|-------|---------------------------|------------------------------|------------------------------|------------------------------|------------------------------|------------------------------|------------------------------|------------------------------|------------------------------|------------------------------|----------------------------|----------------------------|
| Number                                                  | Model | 0 <sup>th</sup> = Minimum | 1 <sup>st</sup> = 10% decile | 2 <sup>nd</sup> = 20% decile | 3 <sup>rd</sup> = 30% decile | 4 <sup>th</sup> = 40% decile | 5 <sup>th</sup> = 50% decile | 6 <sup>th</sup> = 60% decile | 7 <sup>th</sup> = 70% decile | 8 <sup>th</sup> = 80% decile | 9 <sup>th</sup> = 90% decile | 10 <sup>th</sup> = Maximum | 11 <sup>th</sup> = Average |
| 1                                                       | C     | 1.0524                    | 1.0754                       | 1.0832                       | 1.0839                       | 1.0841                       | 1.0843                       | 1.0847                       | 1.1002                       | 1.1186                       | 1.1556                       | 1.3684                     | 1.0983                     |
| 2                                                       | CY    | 1.0240                    | 1.0373                       | 1.0420                       | 1.0424                       | 1.0425                       | 1.0427                       | 1.0429                       | 1.0524                       | 1.0641                       | 1.0889                       | 1.2504                     | 1.0518                     |
| 3                                                       | Cs    | 1.0540                    | 1.0720                       | 1.0779                       | 1.0784                       | 1.0786                       | 1.0788                       | 1.0791                       | 1.0902                       | 1.1032                       | 1.1284                       | 1.2542                     | 1.0884                     |
| 4                                                       | Cs-m  | 1.1049                    | 1.1376                       | 1.1478                       | 1.1486                       | 1.1490                       | 1.1494                       | 1.1499                       | 1.1697                       | 1.1917                       | 1.2327                       | 1.4068                     | 1.1655                     |
| 5                                                       | Cr    | 1.0059                    | 1.0105                       | 1.0123                       | 1.0124                       | 1.0125                       | 1.0126                       | 1.0127                       | 1.0164                       | 1.0214                       | 1.0327                       | 1.1258                     | 1.0165                     |
| 6                                                       | Cr-m  | 1.0358                    | 1.0477                       | 1.0520                       | 1.0523                       | 1.0524                       | 1.0526                       | 1.0528                       | 1.0614                       | 1.0719                       | 1.0943                       | 1.2384                     | 1.0607                     |
| 7                                                       | Cr-s  | 1.4518                    | 1.4537                       | 1.4544                       | 1.4545                       | 1.4545                       | 1.4546                       | 1.4546                       | 1.4562                       | 1.4583                       | 1.4631                       | 1.4998                     | 1.4563                     |
| 8                                                       | HB    | 0.6479                    | 0.7157                       | 0.7345                       | 0.7357                       | 0.7364                       | 0.7371                       | 0.7381                       | 0.7718                       | 0.8071                       | 0.8678                       | 1.0854                     | 0.7620                     |
| 9                                                       | KL    | 1.0419                    | 1.0512                       | 1.0543                       | 1.0547                       | 1.0548                       | 1.0550                       | 1.0552                       | 1.0604                       | 1.0675                       | 1.0808                       | 1.1474                     | 1.0599                     |
| 10                                                      | N     | 1.0000                    | 1.0000                       | 1.0000                       | 1.0000                       | 1.0000                       | 1.0000                       | 1.0000                       | 1.0000                       | 1.0000                       | 1.0000                       | 1.0000                     | 1.0000                     |
| 11                                                      | PE    | 1.0137                    | 1.0227                       | 1.0260                       | 1.0263                       | 1.0264                       | 1.0265                       | 1.0267                       | 1.0335                       | 1.0422                       | 1.0610                       | 1.1924                     | 1.0333                     |
| 12                                                      | PE-m  | 1.0122                    | 1.0210                       | 1.0243                       | 1.0246                       | 1.0247                       | 1.0248                       | 1.0250                       | 1.0319                       | 1.0407                       | 1.0605                       | 1.2069                     | 1.0318                     |
| 13                                                      | P     | 0.7372                    | 0.8475                       | 0.8786                       | 0.8811                       | 0.8819                       | 0.8828                       | 0.8838                       | 0.9437                       | 1.0049                       | 1.1121                       | 1.4892                     | 0.9272                     |
| 14                                                      | P-g   | 1.0144                    | 1.0145                       | 1.0145                       | 1.0145                       | 1.0145                       | 1.0145                       | 1.0145                       | 1.0145                       | 1.0145                       | 1.0156                       | 2.6014                     | 1.0162                     |
| 15                                                      | Q     | 1.0606                    | 1.0764                       | 1.0814                       | 1.0818                       | 1.0820                       | 1.0822                       | 1.0825                       | 1.0923                       | 1.1035                       | 1.1251                       | 1.2298                     | 1.0905                     |
| 16                                                      | WS    | 0.6984                    | 0.7899                       | 0.8156                       | 0.8174                       | 0.8182                       | 0.8191                       | 0.8201                       | 0.8680                       | 0.9173                       | 1.0031                       | 1.3060                     | 0.8544                     |

**Table S2b.** Local non-Newtonian importance factor for all 16 rheological models at early diastole.

| Local non-Newtonian importance factor, $I_L$ , EARLY DIASTOLE |       |                           |                              |                              |                              |                              |                              |                              |                              |                              |                              |                            |                            |
|---------------------------------------------------------------|-------|---------------------------|------------------------------|------------------------------|------------------------------|------------------------------|------------------------------|------------------------------|------------------------------|------------------------------|------------------------------|----------------------------|----------------------------|
| Number                                                        | Model | 0 <sup>th</sup> = Minimum | 1 <sup>st</sup> = 10% decile | 2 <sup>nd</sup> = 20% decile | 3 <sup>rd</sup> = 30% decile | 4 <sup>th</sup> = 40% decile | 5 <sup>th</sup> = 50% decile | 6 <sup>th</sup> = 60% decile | 7 <sup>th</sup> = 70% decile | 8 <sup>th</sup> = 80% decile | 9 <sup>th</sup> = 90% decile | 10 <sup>th</sup> = Maximum | 11 <sup>th</sup> = Average |
| 1                                                             | C     | 1.1746                    | 1.1952                       | 1.2004                       | 1.2088                       | 1.2288                       | 1.2734                       | 1.3212                       | 1.3267                       | 1.3445                       | 1.3682                       | 14.738                     | 1.3150                     |
| 2                                                             | CY    | 1.1000                    | 1.1153                       | 1.1190                       | 1.1248                       | 1.1390                       | 1.1724                       | 1.2103                       | 1.2146                       | 1.2292                       | 1.2480                       | 14.082                     | 1.2158                     |
| 3                                                             | Cs    | 1.1376                    | 1.1513                       | 1.1551                       | 1.1607                       | 1.1729                       | 1.1991                       | 1.2234                       | 1.2265                       | 1.2358                       | 1.2492                       | 11.568                     | 1.2177                     |
| 4                                                             | Cs-m  | 1.2512                    | 1.2703                       | 1.2760                       | 1.2852                       | 1.3041                       | 1.3407                       | 1.3714                       | 1.3754                       | 1.3869                       | 1.4042                       | 2.5896                     | 1.3466                     |
| 5                                                             | Cr    | 1.0368                    | 1.0449                       | 1.0468                       | 1.0497                       | 1.0570                       | 1.0756                       | 1.0976                       | 1.1002                       | 1.1093                       | 1.1209                       | 13.920                     | 1.1158                     |
| 6                                                             | Cr-m  | 1.1036                    | 1.1175                       | 1.1209                       | 1.1262                       | 1.1390                       | 1.1688                       | 1.2013                       | 1.2051                       | 1.2178                       | 1.2344                       | 17.671                     | 1.2070                     |
| 7                                                             | Cr-s  | 1.4652                    | 1.4684                       | 1.4694                       | 1.4710                       | 1.4744                       | 1.4816                       | 1.4879                       | 1.4889                       | 1.4918                       | 1.4966                       | 14.457                     | 1.4988                     |
| 8                                                             | HB    | 0.8920                    | 0.9177                       | 0.9253                       | 0.9373                       | 0.9583                       | 1.0042                       | 1.0466                       | 1.0514                       | 1.0657                       | 1.0846                       | 5.7383                     | 1.0155                     |
| 9                                                             | KL    | 1.0839                    | 1.0917                       | 1.0938                       | 1.0968                       | 1.1033                       | 1.1174                       | 1.1295                       | 1.1312                       | 1.1360                       | 1.1435                       | 7.3675                     | 1.1282                     |
| 10                                                            | N     | 1.0000                    | 1.0000                       | 1.0000                       | 1.0000                       | 1.0000                       | 1.0000                       | 1.0000                       | 1.0000                       | 1.0000                       | 1.0000                       | 1.0000                     | 1.0000                     |
| 11                                                            | PE    | 1.0685                    | 1.0808                       | 1.0837                       | 1.0883                       | 1.0995                       | 1.1264                       | 1.1569                       | 1.1604                       | 1.1725                       | 1.1880                       | 14.483                     | 1.1653                     |
| 12                                                            | PE-m  | 1.0689                    | 1.0822                       | 1.0853                       | 1.0902                       | 1.1023                       | 1.1322                       | 1.1679                       | 1.1719                       | 1.1860                       | 1.2037                       | 14.334                     | 1.1775                     |
| 13                                                            | P     | 1.1838                    | 1.2229                       | 1.2363                       | 1.2563                       | 1.2993                       | 1.3841                       | 1.4636                       | 1.4726                       | 1.4990                       | 1.5361                       | 5.4064                     | 1.4016                     |
| 14                                                            | P-g   | 1.0203                    | 1.0288                       | 1.0307                       | 1.0356                       | 1.0500                       | 1.1266                       | 1.4219                       | 1.4667                       | 1.5933                       | 1.7621                       | 8.8632                     | 1.4349                     |
| 15                                                            | Q     | 1.1325                    | 1.1440                       | 1.1472                       | 1.1521                       | 1.1626                       | 1.1845                       | 1.2038                       | 1.2063                       | 1.2138                       | 1.2248                       | 4.9152                     | 1.1953                     |
| 16                                                            | WS    | 1.0499                    | 1.0832                       | 1.0938                       | 1.1098                       | 1.1426                       | 1.2085                       | 1.2693                       | 1.2762                       | 1.2967                       | 1.3246                       | 4.0785                     | 1.2206                     |

**Table S2c.** Local non-Newtonian importance factor for all 16 rheological models at late diastole.

| Local non-Newtonian importance factor, $I_L$ , LATE DIASTOLE |       |                           |                              |                              |                              |                              |                              |                              |                              |                              |                              |                            |                            |
|--------------------------------------------------------------|-------|---------------------------|------------------------------|------------------------------|------------------------------|------------------------------|------------------------------|------------------------------|------------------------------|------------------------------|------------------------------|----------------------------|----------------------------|
| Number                                                       | Model | 0 <sup>th</sup> = Minimum | 1 <sup>st</sup> = 10% decile | 2 <sup>nd</sup> = 20% decile | 3 <sup>rd</sup> = 30% decile | 4 <sup>th</sup> = 40% decile | 5 <sup>th</sup> = 50% decile | 6 <sup>th</sup> = 60% decile | 7 <sup>th</sup> = 70% decile | 8 <sup>th</sup> = 80% decile | 9 <sup>th</sup> = 90% decile | 10 <sup>th</sup> = Maximum | 11 <sup>th</sup> = Average |
| 1                                                            | C     | 1.3629                    | 1.5592                       | 1.6035                       | 1.6516                       | 1.7106                       | 1.7977                       | 1.9189                       | 2.0444                       | 2.6539                       | 9.6510                       | 13.549                     | 3.0497                     |
| 2                                                            | CY    | 1.2475                    | 1.4159                       | 1.4607                       | 1.5094                       | 1.5721                       | 1.6628                       | 1.8001                       | 1.9372                       | 2.5562                       | 10.683                       | 13.831                     | 3.0880                     |
| 3                                                            | Cs    | 1.2484                    | 1.3538                       | 1.3776                       | 1.4044                       | 1.4383                       | 1.4934                       | 1.5779                       | 1.6604                       | 2.0207                       | 7.1314                       | 69.670                     | 2.6698                     |
| 4                                                            | Cs-m  | 1.3992                    | 1.5192                       | 1.5401                       | 1.5637                       | 1.5915                       | 1.6363                       | 1.6945                       | 1.7467                       | 1.9551                       | 2.3269                       | 2.7601                     | 1.7552                     |
| 5                                                            | Cr    | 1.1239                    | 1.2403                       | 1.2795                       | 1.3220                       | 1.3812                       | 1.4672                       | 1.6156                       | 1.7753                       | 2.3937                       | 13.163                       | 16.138                     | 3.3230                     |
| 6                                                            | Cr-m  | 1.2345                    | 1.3828                       | 1.4219                       | 1.4647                       | 1.5203                       | 1.6032                       | 1.7313                       | 1.8577                       | 2.4151                       | 16.430                       | 41.910                     | 4.1455                     |
| 7                                                            | Cr-s  | 1.4957                    | 1.5369                       | 1.5463                       | 1.5576                       | 1.5727                       | 1.6006                       | 1.6460                       | 1.6961                       | 2.0721                       | 5.3618                       | 32.306                     | 2.3798                     |
| 8                                                            | HB    | 1.0833                    | 1.2229                       | 1.2510                       | 1.2810                       | 1.3164                       | 1.3730                       | 1.4518                       | 1.5233                       | 1.7668                       | 3.1622                       | 54.549                     | 1.7106                     |
| 9                                                            | KL    | 1.1434                    | 1.2012                       | 1.2150                       | 1.2312                       | 1.2525                       | 1.2886                       | 1.3490                       | 1.4153                       | 1.6731                       | 2.7888                       | 49.055                     | 1.6159                     |
| 10                                                           | N     | 1.0000                    | 1.0000                       | 1.0000                       | 1.0000                       | 1.0000                       | 1.0000                       | 1.0000                       | 1.0000                       | 1.0000                       | 1.0000                       | 1.0000                     | 1.0000                     |
| 11                                                           | PE    | 1.1891                    | 1.3328                       | 1.3737                       | 1.4176                       | 1.4761                       | 1.5630                       | 1.6996                       | 1.8357                       | 2.4062                       | 13.510                       | 16.217                     | 3.4015                     |
| 12                                                           | PE-m  | 1.2042                    | 1.3717                       | 1.4194                       | 1.4719                       | 1.5402                       | 1.6375                       | 1.7873                       | 1.9343                       | 2.5605                       | 9.5689                       | 13.053                     | 2.9110                     |
| 13                                                           | P     | 1.5145                    | 1.7723                       | 1.8118                       | 1.8540                       | 1.9009                       | 1.9727                       | 2.0550                       | 2.2007                       | 2.5712                       | 4.4286                       | 5.4854                     | 2.3676                     |
| 14                                                           | P-g   | 1.3195                    | 2.7154                       | 2.9585                       | 3.1435                       | 3.2916                       | 3.4360                       | 3.5661                       | 5.0035                       | 5.9371                       | 7.2991                       | 8.8229                     | 4.1779                     |
| 15                                                           | Q     | 1.2242                    | 1.3100                       | 1.3284                       | 1.3500                       | 1.3769                       | 1.4223                       | 1.4912                       | 1.5585                       | 1.8309                       | 2.6473                       | 8.5033                     | 1.6627                     |
| 16                                                           | WS    | 1.3149                    | 1.5137                       | 1.5475                       | 1.5839                       | 1.6249                       | 1.6901                       | 1.7704                       | 1.8504                       | 2.1549                       | 4.2908                       | 7.2934                     | 2.1361                     |

**Table S3a.** Non-Newtonian effect factor for all 16 rheological models at peak systole.

| Non-Newtonian Effect Factor, NNEF, PEAK SYSTOLE |       |                           |                              |                              |                              |                              |                              |                              |                              |                              |                              |                            |                            |
|-------------------------------------------------|-------|---------------------------|------------------------------|------------------------------|------------------------------|------------------------------|------------------------------|------------------------------|------------------------------|------------------------------|------------------------------|----------------------------|----------------------------|
| Number                                          | Model | 0 <sup>th</sup> = Minimum | 1 <sup>st</sup> = 10% decile | 2 <sup>nd</sup> = 20% decile | 3 <sup>rd</sup> = 30% decile | 4 <sup>th</sup> = 40% decile | 5 <sup>th</sup> = 50% decile | 6 <sup>th</sup> = 60% decile | 7 <sup>th</sup> = 70% decile | 8 <sup>th</sup> = 80% decile | 9 <sup>th</sup> = 90% decile | 10 <sup>th</sup> = Maximum | 11 <sup>th</sup> = Average |
| 1                                               | C     | 0.0063                    | 0.0475                       | 0.0533                       | 0.0551                       | 0.0587                       | 0.0622                       | 0.0647                       | 0.0696                       | 0.0862                       | 0.1232                       | 0.1288                     | 0.0696                     |
| 2                                               | CY    | -0.0149                   | 0.0245                       | 0.0271                       | 0.0290                       | 0.0322                       | 0.0351                       | 0.0377                       | 0.0421                       | 0.0561                       | 0.0838                       | 0.0869                     | 0.0414                     |
| 3                                               | Cs    | 0.0154                    | 0.0436                       | 0.0478                       | 0.0488                       | 0.0512                       | 0.0542                       | 0.0560                       | 0.0592                       | 0.0702                       | 0.0935                       | 0.0977                     | 0.0587                     |
| 4                                               | Cs-m  | 0.0518                    | 0.0819                       | 0.0909                       | 0.0919                       | 0.0944                       | 0.0977                       | 0.0999                       | 0.1030                       | 0.1154                       | 0.1495                       | 0.1569                     | 0.1030                     |
| 5                                               | Cr    | -0.0290                   | 0.0058                       | 0.0071                       | 0.0094                       | 0.0117                       | 0.0141                       | 0.0162                       | 0.0209                       | 0.0301                       | 0.0461                       | 0.0482                     | 0.0182                     |
| 6                                               | Cr-m  | -0.0045                   | 0.0299                       | 0.0323                       | 0.0340                       | 0.0370                       | 0.0398                       | 0.0420                       | 0.0459                       | 0.0582                       | 0.0830                       | 0.0862                     | 0.0452                     |
| 7                                               | Cr-s  | 0.1836                    | 0.2319                       | 0.2359                       | 0.2416                       | 0.2464                       | 0.2472                       | 0.2482                       | 0.2510                       | 0.2551                       | 0.2585                       | 0.2853                     | 0.2462                     |
| 8                                               | HB    | -0.2728                   | -0.1634                      | -0.1476                      | -0.1466                      | -0.1448                      | -0.1423                      | -0.1395                      | -0.1206                      | -0.0901                      | -0.0364                      | -0.0290                    | -0.1248                    |
| 9                                               | KL    | -0.1334                   | 0.0210                       | 0.0252                       | 0.0296                       | 0.0336                       | 0.0373                       | 0.0412                       | 0.0486                       | 0.0544                       | 0.0578                       | 0.0774                     | 0.0373                     |
| 10                                              | N     | 0.0000                    | 0.0000                       | 0.0000                       | 0.0000                       | 0.0000                       | 0.0000                       | 0.0000                       | 0.0000                       | 0.0000                       | 0.0000                       | 0.0000                     | 0.0000                     |
| 11                                              | PE    | -0.0201                   | 0.0153                       | 0.0167                       | 0.0185                       | 0.0213                       | 0.0238                       | 0.0262                       | 0.0304                       | 0.0422                       | 0.0644                       | 0.0668                     | 0.0292                     |
| 12                                              | PE-m  | -0.0242                   | 0.0144                       | 0.0159                       | 0.0179                       | 0.0209                       | 0.0237                       | 0.0263                       | 0.0310                       | 0.0435                       | 0.0676                       | 0.0697                     | 0.0295                     |
| 13                                              | P     | -0.2014                   | -0.0725                      | -0.0455                      | -0.0439                      | -0.0404                      | -0.0363                      | -0.0318                      | -0.0160                      | 0.0327                       | 0.1215                       | 0.1364                     | -0.0134                    |
| 14                                              | P-g   | -0.0648                   | 0.0125                       | 0.0173                       | 0.0201                       | 0.0233                       | 0.0279                       | 0.0337                       | 0.0402                       | 0.0508                       | 0.0838                       | 0.1390                     | 0.0346                     |
| 15                                              | Q     | 0.0248                    | 0.0459                       | 0.0497                       | 0.0506                       | 0.0525                       | 0.0548                       | 0.0564                       | 0.0586                       | 0.0671                       | 0.0871                       | 0.0909                     | 0.0583                     |
| 16                                              | WS    | -0.2326                   | -0.1121                      | -0.0896                      | -0.0883                      | -0.0856                      | -0.0822                      | -0.0783                      | -0.0619                      | -0.0210                      | 0.0519                       | 0.0634                     | -0.0618                    |

**Table S3b.** Non-Newtonian effect factor for all 16 rheological models at early diastole.

| Non-Newtonian Effect Factor, NNEF, EARLY DIASTOLE |       |                           |                              |                              |                              |                              |                              |                              |                              |                              |                              |                            |                            |
|---------------------------------------------------|-------|---------------------------|------------------------------|------------------------------|------------------------------|------------------------------|------------------------------|------------------------------|------------------------------|------------------------------|------------------------------|----------------------------|----------------------------|
| Number                                            | Model | 0 <sup>th</sup> = Minimum | 1 <sup>st</sup> = 10% decile | 2 <sup>nd</sup> = 20% decile | 3 <sup>rd</sup> = 30% decile | 4 <sup>th</sup> = 40% decile | 5 <sup>th</sup> = 50% decile | 6 <sup>th</sup> = 60% decile | 7 <sup>th</sup> = 70% decile | 8 <sup>th</sup> = 80% decile | 9 <sup>th</sup> = 90% decile | 10 <sup>th</sup> = Maximum | 11 <sup>th</sup> = Average |
| 1                                                 | C     | -0.0080                   | 0.0456                       | 0.0600                       | 0.0784                       | 0.0827                       | 0.0869                       | 0.0891                       | 0.0995                       | 0.1170                       | 0.1530                       | 6.6006                     | 0.1005                     |
| 2                                                 | CY    | -0.0232                   | 0.0191                       | 0.0311                       | 0.0354                       | 0.0392                       | 0.0442                       | 0.0497                       | 0.0672                       | 0.0848                       | 0.1140                       | 6.7020                     | 0.0643                     |
| 3                                                 | Cs    | 0.0018                    | 0.0403                       | 0.0506                       | 0.0642                       | 0.0671                       | 0.0697                       | 0.0712                       | 0.0749                       | 0.0847                       | 0.1078                       | 4.290                      | 0.0761                     |
| 4                                                 | Cs-m  | 0.0243                    | 0.0808                       | 0.0909                       | 0.1057                       | 0.1141                       | 0.1296                       | 0.1320                       | 0.1335                       | 0.1394                       | 0.1654                       | 2.5514                     | 0.1254                     |
| 5                                                 | Cr    | -0.0303                   | -0.0091                      | -0.0061                      | -0.0036                      | 0.0005                       | 0.0028                       | 0.0147                       | 0.0357                       | 0.0509                       | 0.0739                       | 6.5022                     | 0.0280                     |
| 6                                                 | Cr-m  | -0.0168                   | 0.0222                       | 0.0338                       | 0.0378                       | 0.0412                       | 0.0459                       | 0.0510                       | 0.0666                       | 0.0814                       | 0.1079                       | 5.9403                     | 0.0634                     |
| 7                                                 | Cr-s  | 0.1021                    | 0.1528                       | 0.1590                       | 0.1650                       | 0.1747                       | 0.1813                       | 0.1863                       | 0.1878                       | 0.1904                       | 0.2050                       | 3.3074                     | 0.1833                     |
| 8                                                 | HB    | -0.1345                   | -0.0687                      | -0.0535                      | -0.0399                      | -0.0228                      | -0.0163                      | -0.0119                      | -0.0088                      | 0.0063                       | 0.0361                       | 3.1950                     | -0.0164                    |
| 9                                                 | KL    | -0.0919                   | 0.0278                       | 0.0317                       | 0.0373                       | 0.0401                       | 0.0419                       | 0.0437                       | 0.0500                       | 0.0537                       | 0.0641                       | 2.3506                     | 0.0465                     |
| 10                                                | N     | 0.0000                    | 0.0000                       | 0.0000                       | 0.0000                       | 0.0000                       | 0.0000                       | 0.0000                       | 0.0000                       | 0.0000                       | 0.0000                       | 0.0000                     | 0.0000                     |
| 11                                                | PE    | -0.0258                   | 0.0089                       | 0.0154                       | 0.0184                       | 0.0225                       | 0.0268                       | 0.0343                       | 0.0520                       | 0.0678                       | 0.0929                       | 6.0659                     | 0.0473                     |
| 12                                                | PE-m  | -0.0303                   | 0.0068                       | 0.0130                       | 0.0159                       | 0.0207                       | 0.0256                       | 0.0334                       | 0.0536                       | 0.0720                       | 0.0994                       | 6.8686                     | 0.0489                     |
| 13                                                | P     | -0.0617                   | 0.0364                       | 0.0539                       | 0.0757                       | 0.1027                       | 0.1321                       | 0.1386                       | 0.1403                       | 0.1545                       | 0.1960                       | 5.4694                     | 0.1223                     |
| 14                                                | P-g   | -0.1372                   | -0.0428                      | -0.0201                      | 0.0229                       | 0.0519                       | 0.0682                       | 0.0718                       | 0.0994                       | 0.1412                       | 0.2323                       | 16.931                     | 0.1066                     |
| 15                                                | Q     | 0.0062                    | 0.0406                       | 0.0499                       | 0.0627                       | 0.0653                       | 0.0668                       | 0.0678                       | 0.0702                       | 0.0788                       | 0.0989                       | 2.6545                     | 0.0709                     |
| 16                                                | WS    | -0.0869                   | -0.0081                      | 0.0079                       | 0.0246                       | 0.0490                       | 0.0676                       | 0.0732                       | 0.0750                       | 0.0888                       | 0.1245                       | 3.9063                     | 0.0613                     |

**Table S3c.** Non-Newtonian effect factor for all 16 rheological models at late diastole.

| Non-Newtonian Effect Factor, NNEF, LATE DIASTOLE |       |                           |                              |                              |                              |                              |                              |                              |                              |                              |                              |                            |                            |
|--------------------------------------------------|-------|---------------------------|------------------------------|------------------------------|------------------------------|------------------------------|------------------------------|------------------------------|------------------------------|------------------------------|------------------------------|----------------------------|----------------------------|
| Number                                           | Model | 0 <sup>th</sup> = Minimum | 1 <sup>st</sup> = 10% decile | 2 <sup>nd</sup> = 20% decile | 3 <sup>rd</sup> = 30% decile | 4 <sup>th</sup> = 40% decile | 5 <sup>th</sup> = 50% decile | 6 <sup>th</sup> = 60% decile | 7 <sup>th</sup> = 70% decile | 8 <sup>th</sup> = 80% decile | 9 <sup>th</sup> = 90% decile | 10 <sup>th</sup> = Maximum | 11 <sup>th</sup> = Average |
| 1                                                | C     | -0.7393                   | -0.4813                      | 0.2089                       | 0.3248                       | 0.3878                       | 0.4888                       | 0.6371                       | 0.9256                       | 1.4769                       | 2.5705                       | 77.472                     | 0.9088                     |
| 2                                                | CY    | -0.8100                   | -0.5178                      | 0.1407                       | 0.2229                       | 0.2768                       | 0.3650                       | 0.5027                       | 0.7668                       | 1.2723                       | 2.2608                       | 74.594                     | 0.7607                     |
| 3                                                | Cs    | -0.9437                   | -0.5361                      | 0.1155                       | 0.2087                       | 0.2460                       | 0.3030                       | 0.3837                       | 0.5340                       | 0.8347                       | 1.4171                       | 43.324                     | 0.4742                     |
| 4                                                | Cs-m  | -0.9552                   | -0.5107                      | 0.1923                       | 0.3240                       | 0.3629                       | 0.4292                       | 0.5135                       | 0.6614                       | 0.9557                       | 1.5583                       | 38.761                     | 0.5786                     |
| 5                                                | Cr    | -0.9900                   | -0.7529                      | 0.0422                       | 0.0922                       | 0.1335                       | 0.2063                       | 0.3206                       | 0.5309                       | 0.9506                       | 1.7342                       | 65.779                     | 0.5073                     |
| 6                                                | Cr-m  | -0.9894                   | -0.7715                      | 0.1204                       | 0.2041                       | 0.2518                       | 0.3298                       | 0.4503                       | 0.6794                       | 1.1251                       | 2.0047                       | 65.898                     | 0.6284                     |
| 7                                                | Cr-s  | -0.9165                   | -0.3554                      | 0.2012                       | 0.3314                       | 0.3783                       | 0.4331                       | 0.5071                       | 0.6364                       | 0.8985                       | 1.4463                       | 34.783                     | 0.5742                     |
| 8                                                | HB    | -0.9511                   | -0.5546                      | 0.0523                       | 0.1194                       | 0.1538                       | 0.2034                       | 0.2723                       | 0.3995                       | 0.6509                       | 1.1493                       | 37.877                     | 0.3405                     |
| 9                                                | KL    | -0.9082                   | -0.4302                      | 0.0563                       | 0.1139                       | 0.1415                       | 0.1695                       | 0.2135                       | 0.2950                       | 0.4625                       | 0.7864                       | 25.460                     | 0.2403                     |
| 10                                               | N     | 0.0000                    | 0.0000                       | 0.0000                       | 0.0000                       | 0.0000                       | 0.0000                       | 0.0000                       | 0.0000                       | 0.0000                       | 0.0000                       | 0.0000                     | 0.0000                     |
| 11                                               | PE    | -0.9899                   | -0.7631                      | 0.0975                       | 0.1670                       | 0.2125                       | 0.2881                       | 0.4079                       | 0.6334                       | 1.0730                       | 1.9320                       | 66.334                     | 0.5926                     |
| 12                                               | PE-m  | -0.7432                   | -0.4508                      | 0.1211                       | 0.1909                       | 0.2432                       | 0.3309                       | 0.4706                       | 0.7358                       | 1.2497                       | 2.2367                       | 76.580                     | 0.7516                     |
| 13                                               | P     | -0.9170                   | -0.7211                      | 0.3082                       | 0.4685                       | 0.5445                       | 0.6647                       | 0.8206                       | 1.1125                       | 1.6798                       | 2.7982                       | 73.286                     | 1.0354                     |
| 14                                               | P-g   | -0.1062                   | 1.1124                       | 1.3516                       | 1.6748                       | 2.1195                       | 2.8737                       | 3.3895                       | 3.7610                       | 5.6570                       | 9.4982                       | 143.23                     | 4.1430                     |
| 15                                               | Q     | -0.9368                   | -0.3862                      | 0.0929                       | 0.1803                       | 0.2137                       | 0.2570                       | 0.3179                       | 0.4353                       | 0.6677                       | 1.1199                       | 33.441                     | 0.3834                     |
| 16                                               | WS    | -0.9801                   | -0.8044                      | 0.1791                       | 0.3044                       | 0.3560                       | 0.4413                       | 0.5516                       | 0.7570                       | 1.1610                       | 1.9476                       | 54.340                     | 0.6606                     |

**Table S4a.** TAWSS for all 16 rheological models.

| Time Average Wall Shear Stress, TAWSS |       |         |                        |                        |                        |                        |                        |                        |                        |                        |                        |         |         |
|---------------------------------------|-------|---------|------------------------|------------------------|------------------------|------------------------|------------------------|------------------------|------------------------|------------------------|------------------------|---------|---------|
| Number                                | Model | Minimum | 1 <sup>st</sup> decile | 2 <sup>nd</sup> decile | 3 <sup>rd</sup> decile | 4 <sup>th</sup> decile | 5 <sup>th</sup> decile | 6 <sup>th</sup> decile | 7 <sup>th</sup> decile | 8 <sup>th</sup> decile | 9 <sup>th</sup> decile | Maximum | Average |
| 1                                     | C     | 0.1854  | 0.3702                 | 0.5604                 | 0.7585                 | 0.8819                 | 0.8992                 | 0.9143                 | 0.9228                 | 0.9446                 | 1.1045                 | 4.3356  | 0.8389  |
| 2                                     | CY    | 0.1788  | 0.3569                 | 0.5400                 | 0.7327                 | 0.8487                 | 0.8654                 | 0.8800                 | 0.8883                 | 0.9091                 | 1.0670                 | 4.2007  | 0.8088  |
| 3                                     | Cs    | 0.1765  | 0.3525                 | 0.5301                 | 0.7248                 | 0.8499                 | 0.8689                 | 0.8874                 | 0.8969                 | 0.9174                 | 1.0738                 | 4.3529  | 0.8121  |
| 4                                     | Cs-m  | 0.1848  | 0.3688                 | 0.5555                 | 0.7584                 | 0.8945                 | 0.9155                 | 0.9349                 | 0.9457                 | 0.9680                 | 1.1281                 | 4.5867  | 0.8534  |
| 5                                     | Cr    | 0.1715  | 0.3422                 | 0.5167                 | 0.7043                 | 0.8155                 | 0.8313                 | 0.8455                 | 0.8536                 | 0.8734                 | 1.0296                 | 4.0627  | 0.7782  |
| 6                                     | Cr-m  | 0.1775  | 0.3544                 | 0.5353                 | 0.7285                 | 0.8464                 | 0.8638                 | 0.8793                 | 0.8879                 | 0.9085                 | 1.0664                 | 4.2299  | 0.8072  |
| 7                                     | Cr-s  | 0.1959  | 0.3911                 | 0.5946                 | 0.8210                 | 0.9812                 | 1.0039                 | 1.0235                 | 1.0349                 | 1.0628                 | 1.2479                 | 4.9612  | 0.9338  |
| 8                                     | HB    | 0.1595  | 0.3185                 | 0.4701                 | 0.6327                 | 0.7288                 | 0.7456                 | 0.7632                 | 0.7724                 | 0.7888                 | 0.9130                 | 3.7823  | 0.6996  |
| 9                                     | KL    | 0.1692  | 0.3379                 | 0.5083                 | 0.6956                 | 0.8168                 | 0.8355                 | 0.8551                 | 0.8651                 | 0.8861                 | 1.0442                 | 4.2924  | 0.7844  |
| 10                                    | N     | 0.1585  | 0.3166                 | 0.4726                 | 0.6541                 | 0.7774                 | 0.7956                 | 0.8152                 | 0.8253                 | 0.8428                 | 0.9914                 | 4.2372  | 0.7433  |
| 11                                    | PE    | 0.1748  | 0.3489                 | 0.5268                 | 0.7170                 | 0.8315                 | 0.8483                 | 0.8634                 | 0.8719                 | 0.8919                 | 1.0481                 | 4.1596  | 0.7933  |
| 12                                    | PE-m  | 0.1764  | 0.3522                 | 0.5334                 | 0.7238                 | 0.8368                 | 0.8529                 | 0.8672                 | 0.8753                 | 0.8954                 | 1.0520                 | 4.1477  | 0.7977  |
| 13                                    | P     | 0.1882  | 0.3757                 | 0.5585                 | 0.7442                 | 0.8616                 | 0.8785                 | 0.8945                 | 0.9035                 | 0.9250                 | 1.0605                 | 4.1219  | 0.8185  |
| 14                                    | P-g   | 0.2256  | 0.4524                 | 0.6731                 | 0.8664                 | 1.0045                 | 1.0101                 | 1.0144                 | 1.0176                 | 1.0278                 | 1.1702                 | 4.2688  | 0.9332  |
| 15                                    | Q     | 0.1745  | 0.3483                 | 0.5236                 | 0.7180                 | 0.8447                 | 0.8643                 | 0.8834                 | 0.8934                 | 0.9135                 | 1.0696                 | 4.3841  | 0.8075  |
| 16                                    | WS    | 0.1750  | 0.3494                 | 0.5180                 | 0.6936                 | 0.8006                 | 0.8187                 | 0.8357                 | 0.8450                 | 0.8642                 | 0.9949                 | 3.9927  | 0.7649  |

**Table S4b.** OSI for all 16 rheological models.

| Oscillatory Shear Index, OSI |       |         |                        |                        |                        |                        |                        |                        |                        |                        |                        |         |         |
|------------------------------|-------|---------|------------------------|------------------------|------------------------|------------------------|------------------------|------------------------|------------------------|------------------------|------------------------|---------|---------|
| Number                       | Model | Minimum | 1 <sup>st</sup> decile | 2 <sup>nd</sup> decile | 3 <sup>rd</sup> decile | 4 <sup>th</sup> decile | 5 <sup>th</sup> decile | 6 <sup>th</sup> decile | 7 <sup>th</sup> decile | 8 <sup>th</sup> decile | 9 <sup>th</sup> decile | Maximum | Average |
| 1                            | C     | 0.0011  | 0.0667                 | 0.1007                 | 0.1269                 | 0.1551                 | 0.1844                 | 0.2062                 | 0.2221                 | 0.2350                 | 0.3288                 | 0.3486  | 0.1786  |
| 2                            | CY    | 0.0012  | 0.0668                 | 0.1015                 | 0.1281                 | 0.1579                 | 0.1888                 | 0.2113                 | 0.2274                 | 0.2413                 | 0.3321                 | 0.3522  | 0.1817  |
| 3                            | Cs    | 0.0006  | 0.0674                 | 0.1033                 | 0.1318                 | 0.1608                 | 0.1900                 | 0.2120                 | 0.2314                 | 0.2476                 | 0.3558                 | 0.3761  | 0.1872  |
| 4                            | Cs-m  | 0.0003  | 0.0672                 | 0.1019                 | 0.1299                 | 0.1567                 | 0.1841                 | 0.2052                 | 0.2247                 | 0.2395                 | 0.3544                 | 0.3742  | 0.1835  |
| 5                            | Cr    | 0.0013  | 0.0669                 | 0.1022                 | 0.1297                 | 0.1613                 | 0.1940                 | 0.2174                 | 0.2343                 | 0.2500                 | 0.3411                 | 0.3615  | 0.1863  |
| 6                            | Cr-m  | 0.0010  | 0.0670                 | 0.1019                 | 0.1290                 | 0.1587                 | 0.1895                 | 0.2120                 | 0.2290                 | 0.2436                 | 0.3394                 | 0.3595  | 0.1835  |
| 7                            | Cr-s  | 0.0004  | 0.0635                 | 0.0971                 | 0.1246                 | 0.1506                 | 0.1782                 | 0.1987                 | 0.2184                 | 0.2332                 | 0.3555                 | 0.3751  | 0.1791  |
| 8                            | HB    | 0.0005  | 0.0734                 | 0.1109                 | 0.1403                 | 0.1702                 | 0.1992                 | 0.2204                 | 0.2412                 | 0.2586                 | 0.3625                 | 0.3831  | 0.1952  |
| 9                            | KL    | 0.0003  | 0.0676                 | 0.1046                 | 0.1360                 | 0.1668                 | 0.1970                 | 0.2205                 | 0.2423                 | 0.2615                 | 0.3694                 | 0.3902  | 0.1944  |
| 10                           | N     | 0.0001  | 0.0686                 | 0.1078                 | 0.1406                 | 0.1715                 | 0.2008                 | 0.2238                 | 0.2499                 | 0.2727                 | 0.3907                 | 0.4114  | 0.2010  |
| 11                           | PE    | 0.0011  | 0.0670                 | 0.1023                 | 0.1295                 | 0.1600                 | 0.1914                 | 0.2142                 | 0.2310                 | 0.2460                 | 0.3397                 | 0.3599  | 0.1846  |
| 12                           | PE-m  | 0.0013  | 0.0667                 | 0.1014                 | 0.1283                 | 0.1586                 | 0.1903                 | 0.2131                 | 0.2291                 | 0.2432                 | 0.3310                 | 0.3511  | 0.1824  |
| 13                           | P     | 0.0008  | 0.0711                 | 0.1047                 | 0.1306                 | 0.1558                 | 0.1816                 | 0.2013                 | 0.2170                 | 0.2288                 | 0.3307                 | 0.3499  | 0.1783  |
| 14                           | P-g   | 0.0028  | 0.0627                 | 0.0921                 | 0.1136                 | 0.1388                 | 0.1658                 | 0.1824                 | 0.1903                 | 0.1957                 | 0.2317                 | 0.2497  | 0.1494  |
| 15                           | Q     | 0.0004  | 0.0675                 | 0.1036                 | 0.1325                 | 0.1615                 | 0.1907                 | 0.2127                 | 0.2333                 | 0.2504                 | 0.3621                 | 0.3824  | 0.1889  |
| 16                           | WS    | 0.0006  | 0.0722                 | 0.1075                 | 0.1346                 | 0.1617                 | 0.1892                 | 0.2096                 | 0.2275                 | 0.2415                 | 0.3460                 | 0.3659  | 0.1858  |

**Table S4c.** RRT for all 16 rheological models.

| Relative Residence Time, RRT |       |         |                        |                        |                        |                        |                        |                        |                        |                        |                        |         |         |
|------------------------------|-------|---------|------------------------|------------------------|------------------------|------------------------|------------------------|------------------------|------------------------|------------------------|------------------------|---------|---------|
| Number                       | Model | Minimum | 1 <sup>st</sup> decile | 2 <sup>nd</sup> decile | 3 <sup>rd</sup> decile | 4 <sup>th</sup> decile | 5 <sup>th</sup> decile | 6 <sup>th</sup> decile | 7 <sup>th</sup> decile | 8 <sup>th</sup> decile | 9 <sup>th</sup> decile | Maximum | Average |
| 1                            | C     | 0.2313  | 1.0423                 | 1.3759                 | 1.5926                 | 1.7566                 | 1.8802                 | 2.0055                 | 2.1279                 | 2.5674                 | 7.8963                 | 9.3393  | 2.6108  |
| 2                            | CY    | 0.2388  | 1.0793                 | 1.4365                 | 1.6708                 | 1.8480                 | 1.9840                 | 2.1191                 | 2.2580                 | 2.6622                 | 8.3548                 | 9.9264  | 2.7500  |
| 3                            | Cs    | 0.2302  | 1.0710                 | 1.4228                 | 1.6559                 | 1.8362                 | 1.9800                 | 2.1417                 | 2.3090                 | 2.8185                 | 9.8460                 | 11.989  | 2.9737  |
| 4                            | Cs-m  | 0.2183  | 1.0196                 | 1.3382                 | 1.5471                 | 1.7100                 | 1.8433                 | 1.9889                 | 2.1356                 | 2.7015                 | 9.3166                 | 11.287  | 2.8001  |
| 5                            | Cr    | 0.2469  | 1.1187                 | 1.5020                 | 1.7565                 | 1.9521                 | 2.1042                 | 2.2553                 | 2.4203                 | 2.7937                 | 9.2159                 | 11.065  | 2.9611  |
| 6                            | Cr-m  | 0.2370  | 1.0790                 | 1.4380                 | 1.6729                 | 1.8533                 | 1.9904                 | 2.1345                 | 2.2827                 | 2.7093                 | 8.8008                 | 10.523  | 2.8231  |
| 7                            | Cr-s  | 0.2019  | 0.9157                 | 1.2004                 | 1.3860                 | 1.5321                 | 1.6502                 | 1.7818                 | 1.9068                 | 2.5079                 | 8.8521                 | 10.737  | 2.5888  |
| 8                            | HB    | 0.2648  | 1.2748                 | 1.6924                 | 1.9706                 | 2.1855                 | 2.3590                 | 2.5655                 | 2.7926                 | 3.2524                 | 11.425                 | 14.028  | 3.4963  |
| 9                            | KL    | 0.2335  | 1.1001                 | 1.4781                 | 1.7360                 | 1.9415                 | 2.1123                 | 2.3145                 | 2.5266                 | 3.0249                 | 11.337                 | 14.111  | 3.2870  |
| 10                           | N     | 0.2361  | 1.1623                 | 1.5620                 | 1.8397                 | 2.0568                 | 2.2474                 | 2.4888                 | 2.7669                 | 3.3714                 | 14.452                 | 18.964  | 3.8445  |
| 11                           | PE    | 0.2411  | 1.0991                 | 1.4681                 | 1.7118                 | 1.8971                 | 2.0409                 | 2.1879                 | 2.3420                 | 2.7480                 | 8.9557                 | 10.723  | 2.8800  |
| 12                           | PE-m  | 0.2419  | 1.0947                 | 1.4607                 | 1.7012                 | 1.8840                 | 2.0243                 | 2.1613                 | 2.3040                 | 2.6879                 | 8.4051                 | 9.9804  | 2.7844  |
| 13                           | P     | 0.2432  | 1.0934                 | 1.4138                 | 1.6182                 | 1.7739                 | 1.8935                 | 2.0154                 | 2.1333                 | 2.6312                 | 7.8668                 | 9.2669  | 2.6302  |
| 14                           | P-g   | 0.2360  | 0.9746                 | 1.2532                 | 1.4089                 | 1.5092                 | 1.5636                 | 1.6021                 | 1.6320                 | 1.9710                 | 4.1204                 | 4.6292  | 1.8255  |
| 15                           | Q     | 0.2284  | 1.0753                 | 1.4292                 | 1.6633                 | 1.8463                 | 1.9958                 | 2.1660                 | 2.3457                 | 2.8802                 | 10.421                 | 12.790  | 3.0711  |
| 16                           | WS    | 0.2509  | 1.1682                 | 1.5267                 | 1.7597                 | 1.9390                 | 2.0810                 | 2.2367                 | 2.3970                 | 2.8869                 | 9.3018                 | 11.151  | 2.9798  |
